**Sexual production is regulated by the brood in *Bombus impatiens* colonies**

Priscila K. F. Santos, Cameron S. Murray, Etya Amsalem

Department of Entomology, Center for Chemical Ecology, Center for Pollinator Research, Huck  
Institutes of the Life Sciences, Pennsylvania State University, University Park, PA 16802 U.S.A.

# **Abstract**

Colony sociobiology in social Hymenoptera is shaped by multiple factors including the queen, colony size, worker demography, and other environmental and genetic factors. The production of sexuals, particularly of gynes, often marks the climax of colony development and the ultimate purpose for building the worker force. However, the mechanisms regulating this process are largely unknown in most species.

Here we examined the role of the brood in regulating sexual production and shaping colony development using colonies of the social bumble bee *Bombus impatiens*. In this species, the impact of the queen on worker reproduction and aggression is stronger when combined with the brood, and young larvae are able to reduce egg-laying in workers. However, these studies were conducted using small female groups, and how the brood regulates colony-level events, such as the onset of worker reproduction and gyne production, remained unexplored. To address this, we examined the development of young colonies containing double amount of brood (db), no brood (nb), and unmanipulated control colonies for 26 days. We show that following brood manipulation, db colonies produced significantly more gynes whereas nb colonies produced significantly more males. Additionally, we found that worker reproduction started sooner in nb colonies and was delayed in db colonies, while aggression overall was the highest in the db colonies. Overall, our findings indicate that the brood effect is not limited to small groups and has significant implications on colony development and sociobiology. The mechanisms determining female castes in social species are still mostly unknown and brood may be a key to understanding how demographical changes throughout the colony development shape social behavior and may also explain the variation in reproductive strategies across bumble bee colonies and other social species.

# Introduction

Social insects can produce giant colonies, however most of the individuals function as helpers and do not reproduce and are designed to achieve one main goal – to support the production of a limited amount of sexuals. Annual social species like bumble bees [1] and social wasps [2] slowly build up the worker force to support the production of new queens and males in a single event via a strategy called “bang-bang” theory (an abrupt shift from producing workers to sexuals) [3], whereas perennial species like honey bees and many species of ants alternate between cycles of worker and sexual production. Timing sexual production, particularly gynes (new queens), is critical for synchronizing emergence with mating and floral availability but the factors triggering this event remain mostly unknown [4].

Queens are morphologically, physiologically, and behaviorally different than workers [5] and their life trajectory is often determined during larval development [6, 7]. The determination of female caste early in development sets the foundation for the reproductive division of labor in social insect species, and therefore, for the entire social organization [7]. Thus, understanding the triggers for producing sexuals is of a significant importance to the study of social insect sociobiology and the evolution of female castes.

Data on the triggers leading to sexual production are limited and/or controversial. Most studies were conducted in bumble bees and social wasps and point to either no clear triggers or weak correlations between sociobiological or environmental factors and sexual production [4]. In bumble bees (*Bombus terrestris*), it was shown that gyne production is affected by factors related to the queen, but not by factors related to workers. Preventing workers from contacting the queen [8], or transferring old queens to young colonies [9], or allowing workers contact with gyne larvae [10] resulted in earlier gyne production. Decreasing workers’ age or keeping colony size constant and low (and supposedly below the minimum threshold needed for the production of gynes) [9], or manipulating worker density and egg laying rate by the queen [11] did not influence the onset of gyne production. Contrary, when the number of workers was doubled and queen eggs were replaced with male eggs, gyne production occurred earlier [12]. Finally, in *Bombus lucorum*, increasing worker mortality rate in either young or old colonies did not affect gyne production, but stressed colonies invested less in males compared to controlled colonies [13]. In *Polistes* wasps (*P. gallicus* L), gyne production occurs after a fixed time interval, irrespective of the production

of workers [14], and in *Vespula vulgaris*, it has been shown that when old queens are transferred into a young colony, they immediately initiate queen production [15], pointing again to the physiological age of the queen as a potential trigger. In perennial species, the switch to rearing sexuals is presumably determined by seasonal changes in population size. In the honeybee, the only species where such information is available, males and gynes are produced as the population increases in late spring and early summer [16]. Overall, data so far provide mostly controversial or negative results in a limited number of studies and species.

In recent years, there was a significant growth in evidence demonstrating the role of the brood in shaping the social environment in Hymenoptera [17]. Studies showed that different stages of brood regulate worker reproduction in several species, including larva and pupae in *A. mellifera* [18-20], larvae in *Novomessor cockerelly* and eggs in *Comptonotus floridanus* [21, 22], larvae in *Oocerae biroi* [23], and larvae and pupae in *Bombus impatiens* [24]. The brood can also regulate workers' task allocation like accelerating the transition from nursing to foraging tasks, increasing the number of foraging trips and the size of pollen loads in *A. mellifera* [20, 25, 26], and increasing the foraging activity of *O. biroi* [27]. Furthermore, the ratio between the brood and workers was suggested to regulate queen production in several bumble bee species in an earlier study [28]. However, the data is mostly descriptive and not much was done since then to test this hypothesis, and overall, the role of the brood in regulating sexual production has been overlooked.

Bumble bees are an excellent system to examine whether the brood triggers sexual production since they are annual and semelparous. The colony life cycle starts with a single, mated queen that lays eggs following a winter diapause. Initially, the queen performs all the tasks in the colony but switches to focusing on reproduction once the first worker emerges [1]. The queen monopolizes reproduction for approximately 4-5 weeks following the first emergence but loses dominance as the colony grows and transitions into the competition phase (CPh). During this phase, that highly correlates with the timing of gyne production [29], workers compete with the queen and among themselves on male production by exhibiting aggressive behavior, oophagy and egg laying [30]. Gynes are produced towards the end of the season, and typically also males, though males can also be produced earlier [31], and colonies differ substantially in the number and type of sexuals they produce, with some colonies specializing in producing female sexuals (queens) and other in

producing males [32]. This split sex ratio was partially explained in the diapause regime queen experienced prior to funding a colony [32].

In this study, we examined how the amount of brood affects colony development and demography using full size colonies of *Bombus impatiens*. Recent studies in this species show that (a) young larvae decrease while pupae increase worker egg laying [24]; (b) the impact of the queen on worker ovary activation is stronger when combined with the brood [33], and (c) the queen pheromonal secretion is only effective when combined with brood [34]. Altogether, demonstrating how significant is the brood to the social organization. We manipulated the amount of brood in the colonies by transferring all the brood from one colony to another, resulting in colonies with no brood (**nb**), or with a double amount of brood (**db**). These colonies were compared to unmanipulated colonies that served as control (**c**). We examined aggressive behavior towards and by the queen, worker ovary activation, and the production of egg batches, brood, workers and sexuals for 26 days. We hypothesized that an increased amount of brood will decrease the levels of worker reproduction as found previously in small groups of workers [24, 33]. A larger amount of brood is expected to support an earlier production of gynes, whereas aggression could be either higher or lower. If aggression follows the levels of worker reproduction, it should be lower after doubling the brood amount, but could also be higher if it follows the increased colony size and the presence of gynes.

## Material and Methods

**Bumble bee rearing.** *Bombus impatiens* colonies at the approximate age of 3-4 weeks from the emergence of the first worker (n=16) were obtained from Koppert Biological Systems (Howell, MI, USA). All colonies contained a queen, workers ( $72 \pm 5$ , mean  $\pm$  SE), and brood of different developmental stages. The colonies were kept in the laboratory under constant darkness, 60% relative humidity, and temperature of 28-30° C. They were provided with unlimited 60% sugar solution and fresh pollen collected by honeybees and purchased from Koppert. Colonies were handled under red light.

**Experimental design.** Sixteen colonies of approximately the same wet mass were assigned to three treatments. Six colonies containing queen, workers and brood remained unmanipulated and served

as controls (**c**). The remaining 10 colonies were randomly divided to two, and all the brood from five colonies was removed and transferred to the other five, resulting in colonies with no brood (**nb**) and in colonies with a double amount of brood (**db**) in the first day of the experiment. All colonies remained with their own original queen and workers. The experiment was conducted in two consecutive replicates, each containing eight colonies. Colonies were provided unlimited food and kept in the conditions above for 26 days following the manipulation. During this time, we controlled for colony growth (see below), observed aggression towards and by the queen (below), sampled workers for ovary activation (below), and measured the colony wet mass (below). The number of new egg batches was counted daily. Upon termination of the experiment, the numbers of eggs and larvae were counted, and the larva body mass was measured. The pupae were also counted but were kept in the colonies until they emerged, and the resulting caste (worker, male, queen) was documented. All individuals that emerged from the pupae were counted for the total number of adults (workers, gynes, males) produced in each colony. Larva body size distribution in each colony is presented using all larvae with a body mass larger than 0.1 g. This cutoff was chosen since differences in body mass between castes (queen/workers) are measurable only in the third instar, corresponding to approximately 0.1 g [35].

*Control for colony growth:* To control for differences in the growth of colonies throughout the experiment (i.e., colonies with no brood could not produce new workers), newly-emerged workers (< 24 h old) were collected daily from all worker-producing colonies and were equally redistributed across all colonies, creating a normal growth in all colonies regardless of the amount of brood.

*Colony mass:* Colonies were weighted twice at the beginning of the experiment before and after the social manipulation and then every other day throughout the experiment using an electronic scale.

*Aggressive behavior:* colonies were video-recorded for aggression towards and by the queen every other day. Video recording (20 minutes per colony) was performed between 9 a.m. to 1 p.m. Approximately 70 hours of videos were analyzed by an observer blind to the experimental design and hypotheses. Four different behaviors were counted and summed: (1) attack: this behavior included overt aggression in the form of pulling, dragging or an attempt to sting; (2) darting: a sudden movement of a bee towards another bee without a body contact, (3) climbing: a behavior

in which one bee walks on top of another bee; and (4) humming: a series of short wing vibrations towards another bee that are conducted while the bee is in movement [36-38]. The behaviors performed by the queen towards workers (“queen aggression”) and by workers towards the queen (“worker aggression”) were summed separately and are presented as the average of the sum behaviors in 20 minutes.

*Worker ovarian activation:* 10-15% of the workers in each colony were collected at five timepoints (on days 1, 7, 13, 19, and 26), and a subset of them (5-10 workers / colony / time point) were dissected for ovary activation. To measure the terminal oocyte size, worker abdomen was dissected under a stereomicroscope. The two ovaries were transferred to a drop of water and the three largest oocytes were measured using the stereomicroscope ruler. The length of the three largest oocytes was averaged and is presented in mm.

*Statistical analyses.* Statistical analyses were performed using R Studio-v1.2.5033. To examine the effect of treatment on colony wet mass, new egg batches, worker oocyte size, aggression, the total number of eggs, larvae, pupae, workers, males, and gynes, we used either a linear model (lm), or a generalized linear model (glm) with a Poisson distribution, depends on whether the residuals of the model were normally distributed or not (Shapiro-Wilk normality test,  $p \geq 0.05$ ). lm was used to compare the average oocyte size and the total number of eggs, larvae, pupae, and workers across the treatments. glm was used to compare colony wet mass, new egg batches, aggression, total gynes and males. The linear models were fit using lm function from lme4-v1.1.26 R package [39] and the generalized linear models using glm function from stats-v4.1.1 package included in R-v.3.6.3. All models were fitted using the treatment as a fixed effect. When data were collected throughout the experiment (i.e., colony wet mass, new egg batches, oocyte size, and aggression), we also included the timepoint and the interaction between the timepoint and treatment as fixed effects. Since the experiment was conducted in two consecutive replications, we also included the term “repeat” as a random effect when it improved the model fit. The best model (with or without the repeat variable) was determined using ANOVA. Post-hoc pairwise comparisons across the treatments were performed using estimated marginal means using emmeans-v1.5.4 R package. To test the effect of treatment on the bimodality of larval body mass distribution, we use the ACR method implemented in the multimode-v1.5 R package [40, 41]. Figures were created using

ggplot2-v3.3.5 and ggpubr-v0.4.0. Statistical significance was accepted at  $\alpha=0.05$ . Data are presented as means  $\pm$  S.E.M.

## Results

*Colony wet mass.* The wet mass of the colonies at the beginning of the experiment (“day zero”, Figure 1) was similar across all three treatments and was modified (“day 1”) according to the desired manipulation. Colony wet mass increased throughout the experiment in all three treatments, reflecting the increase in worker populations and brood and indicating a normal and healthy development of all colonies. Post-hoc comparison showed that the colony wet mass was significantly different among the three treatments in all days following the manipulation (Tukey’s post hoc test  $p<0.05$ ) with the highest wet mass in the double brood (**db**) colonies and the lowest in the no brood (**nb**) colonies. Control colonies exhibit intermediate values.

*Production of new egg batches.* The number of newly-laid egg batches increased significantly in the **nb** colonies, approximately one week after the onset of the experiment as compared to at least one of the other two treatments (Figure 2). These differences were maintained for about two weeks and were significantly higher in **nb** compared to the other treatments on days 6, 7, 9, and 12 (glmm followed by Tukey’s post hoc test  $p\leq 0.05$ ). **db** colonies produced less egg batches than the other treatments throughout the experiment, but significant difference compared to the control was observed only on day 16 ( $p<0.05$ ; Figure 2).

*Aggression by and towards the queen.* On average, workers in **db** colonies presented significantly more aggressive behaviors towards the queen (glmm followed by Tukey’s post-hoc test,  $p < 0.05$ ) and the queen presented significantly more aggressive behavior towards workers (glm followed by Tukey’s post-hoc test,  $p<0.05$ ; Figure 3) compared to workers in **nb** and **c** colonies. However, one **db** colony was a clear outlier in the number of behaviors performed by the queen on day four (33 compared to 0-9 in other colonies) and towards the queen (18 compared to 0-12 in other colonies). Reanalyzing the data without this colony resulted in similar outcomes for worker aggression towards the queen (higher in **db** compared to **nb** and **c** colonies) but not for the amount of aggression presented by the queen (insignificant differences between all treatments). Throughout the experiment, there were significant differences between all treatments in the



aggression performed by the workers on days 8 and 12 (glmm followed by Tukey's post hoc test  $p < 0.05$ ) and no differences in the aggression performed by the queen (glm followed by Tukey's post hoc test  $p < 0.05$ ) (Supplementary Figure S1).

*Workers' ovary activation.* On the first day of the experiment, all workers had inactivated ovaries and there were no significant differences in the average terminal oocyte of workers (lmm followed by Tukey's post hoc test  $p > 0.05$ ; Figure 4). The control colonies exhibit normal development throughout the experiment, as evidence by an increase in the average terminal oocyte of workers about two weeks after the experiment onset. The manipulation was conducted on colonies that were approximately 3-4 weeks old (counted from the emergence of the first workers) and an additional 2 weeks brought these colonies to the competition phase where workers activate their ovaries [30]. A significant increase in the average terminal oocyte size of workers was observed in the **nb** colonies compared to the other two treatments on day 7 to the manipulation, and between **nb** and **db** in days 13 and 25 (lmm followed by Tukey's post hoc test  $p < 0.05$ ). On day 19, the differences were apparent but smaller and non-significant.

*Production of brood and adults.* The total number of brood (eggs, larvae, and pupae) did not vary across treatments on the last day of the experiment (day 26) (lm: Eggs or Larvae or Pupae ~ Treatment; Tukey's post hoc test  $p < 0.05$ ; Figure 5). However, the total number of adults (including those that emerged from pupae after the last day of the experiment) was significantly different among treatments. **nb** colonies produced fewer workers (lm followed by Tukey's post hoc test  $p < 0.05$ ) and more males than **db** and **c** (glm followed by Tukey's post hoc test  $p < 0.05$ ), while **db** colonies produced more gynes (lmm followed by Tukey's post hoc test  $p < 0.05$ ; Figure 6).

The workers:larvae ratio by the end of the experiment was biased in favor of workers in **db** colonies (mean 3.4:1), nearly balanced in **c** colonies (mean 1.3:1) and biased in favor of larvae in **nb** colonies (mean 0.6:1) (Table S2). All **db** colonies, except one, produced gynes. Three **db** colonies started producing gynes a few days after the onset of the experiment and produced much more gynes than the other colonies. On the other hand, only one **nb** colony and half of the control colonies produced gynes during the experiment (Supplementary Table S1).

*Distribution of larva body mass.* The differences between the treatments in gyne production are reflected also in the body mass distribution of larvae that were collected and weighted on the last day of the experiment (day 26). The larvae in **db** colonies showed a bimodal distribution of larva

mass, corresponding to larvae that will develop into workers/males and gynes, while **c** and **nb** colonies show a unimodal distribution, indicating the production of workers/males ( $p < 0.05$ ; Figure 7).

## Discussion

In this study we show that manipulating the amount of brood in a colony has significant impacts on colony development, sexual production and workers' behavior and reproduction. Colonies with double brood produced more gynes, while colonies with reduced brood produced more males. Furthermore, increased amount of brood led to an increase in worker aggression towards the queen whereas decreased amount of brood led to workers activating their ovaries sooner. Overall, these findings shed light on the impacts of brood on worker reproduction, colony development and sexual production in *B. impatiens*, and suggest the role of brood in shaping the social structure in social insects is larger than assumed.

In natural colonies, different amount of brood may be determined by environmental conditions (availability of resources) or the intrinsic quality of the queen. Either of these may shape the strategy of the colony to invest on either gynes that are larger and take longer to develop or in males that are smaller and cheaper to produce [42]. Indeed, in a previous study [32], queens produced colonies with varying amount of gynes and males following different regimes of diapause and CO<sub>2</sub> treatment. This effect could be mediated by the physiological state of the queen and the amount of brood she produced. Bumble bee queens are able to switch between laying diploid female eggs to haploid males and colonies are generally divided into early and late switch [30]. The switch point is unrelated to the competition phase and lack of correlations between these two events was established in multiple studies [43]. Queens that switches early to lay eggs typically produce smaller colonies, less gynes and more males in line with the profile of the **nb** colonies [30]. Although it is unclear whether the eggs in **nb** colonies were laid by the queen (who switched to lay males) or the workers (that started the competition), it is likely that they were laid by the queen. While workers in these colonies did activate their ovaries sooner, there were no other signs for active competition (e.g., multiple open egg cells, oophagy, egg laying by workers during observations) and workers exhibit low levels of aggression. If it is indeed the queen that laid the eggs in the **nb** colonies, the higher investment in males could indicate a switch in the queen's

strategy to invest in sexuals that are cheaper to produce. These strategies make sense given that **nb** colonies were also smaller, and thus, they did not only lack brood (and therefore lacked the future worker force needed to support gyne production), but also contained smaller worker population throughout the experiment that could support gyne production. None of the colonies in the study were small by any mean (on average **nb** had slightly less than 400 workers whereas controls and the **db** colonies had slightly more than 600 workers), but differences in the population size accumulated throughout the experiment despite our daily effort to redistribute newly-emerged workers, likely due to the inability to locate all newly-emerged workers in colonies with hundreds of workers before they became indistinguishable. Colony size and reduced amount of brood likely correlate also in non-manipulated colonies, and both could influence the queen to invest on either queens or males. It is also important to note that the manipulation we conducted in the amount of brood, although extreme, did not affect colony survival or health. All manipulated colonies recovered quickly, as evident by the normal mass gain throughout the experiment (Figure 1) and by no significant differences in the amount of brood by the end of the experiment (Figure 5). This quick recovery was partially achieved by a temporary increase in egg laying in **nb** colonies (Figure 2), indicative of the plasticity of colonies.

Previous studies in bumble bees pointed on many factors that do not trigger gyne production, but several studies did provide positive results. The first by Alaux et al 2005 showed that transferring an old queen into a young colony resulted in an earlier competition and gyne production [9]. They concluded that age-dependent change in the queen triggers gyne production. However, it is interesting to note that the treatment groups in this experiment (C17/Q10 and C10/Q17) also differed in the worker number and in the ratio of larvae to workers. Young colonies with old queens (Q17/C10) that initiated gyne production earlier, were also smaller (~14 workers vs ~35) and with higher larva/worker ratio, so the differences in the timing of gyne production could simply be the results of differences in brood/worker ratio. Another study by Bloch [12], showed that replacing the queen eggs with male eggs or doubling the number of workers also advanced gyne production in *B. terrestris*. One point worth noting in this study is that the author replaced all the eggs laid by the queen with either male or female eggs of a donor but 50% of the male eggs and 20% of the female eggs did not survive to the last day of the experiment. Gyne production was earlier in the groups with doubled workers and male eggs, thus, again, in the groups where the ratio between

workers and brood was high. Gyne production in the two studies occurred in either smaller colonies [9] or larger colonies [12], but in both cases, the worker/brood ratio was high, which could explain why the colony size is controversial across studies. We believe that a closer look into other studies will likely reveal that the brood amount was a confounding factor in many of them, if not in all of them.

Despite the increase in workers' ovary activation in **nb** colonies, they did not exhibit or received more aggressive towards/by the queen compared to the control colonies. In fact, the aggression levels were much higher in the **db** colonies where lower activation of ovaries was observed. This may indicate that aggression and ovary activation are not necessarily interlinked, despite previous correlations in small groups of workers [38, 44-46]. It is possible that aggression is triggered by the density of workers (**db** colonies were larger), close to the production of gynes (**db** colonies produced gynes) or simply precedes ovarian activation and disappear once hierarchies are determined [38]. The lack of aggression in **nb** workers is in line with Bourke and Ratnieks (2001) study about the conflict over male parentage [47]. They proposed that workers from male specialist colonies (early-switch) may have a delay identifying the male brood until late stages of larval development which result in a delay of the competition point [30, 48].

Overall, our results show that the brood regulates not only egg laying in small groups of workers, as we found before [24], but also influences colony level events such as the beginning of the competition and the timing of gyne production. These data support and extend our previous findings showing that the effect of the queen on worker reproduction and aggression was stronger in the presence of brood [33]. The current study shows that workers activate their ovaries in colonies without brood, even in the presence of the queen in relatively young colonies (Figure 4), emphasizing the limited impact of the queen and the ability of workers to gather information from multiple sources to meet their reproductive interests. We further found that doubling the amount of brood induces an earlier transition to gyne production whereas the removal of the brood induces worker reproduction and an increase in the production of males. These findings emphasize the importance of the brood in maintaining and shaping the social organization in social insects and the need to investigate its diverse role across other taxa.

## Acknowledgements

We would like to thank John M. Craig, Andrea Medero and Katie Barie for assisting in the experiments.

### **Author Contributions**

EA and PS designed the study. PS conducted the experiments and analyzed the data. CM analyzed the behavioral videos. PS and EA wrote the manuscript. All co-authors commented on the final draft.

### **Competing interests**

The authors declare no competing interests.

### **Funding**

This work was funded by NSF-CAREER IOS-1942127 to EA.

# References

1. Amsalem, E., et al., *The physiological and genomic bases of bumble bee social behaviour*, in *Genomics, Physiology and Behaviour of Social Insects*, Z. Amro and F.K. Clement, Editors. 2015, Academic Press: Adv In Insect Phys. p. 37-93.
2. Jandt, J.M., E.A. Tibbetts, and A.L. Toth, *Polistes paper wasps: a model genus for the study of social dominance hierarchies*. *Insectes Sociaux*, 2013. **61**(1): p. 11-27.
3. Macevicz, S. and G. Oster, *Modeling social insect populations II: Optimal reproductive strategies in annual eusocial insect colonies*. *Behavioral Ecology and Sociobiology*, 1976. **1**(3): p. 265-282.
4. Hovestadt, T., T. Degen, and O. Mitesser, *Suitable triggers for timing the transition from worker to sexual production in annual eusocial insects*. *Insectes Sociaux*, 2018. **65**(4): p. 609-617.
5. Treanore, E.D., N. Derstine, and E. Amsalem, *What can mechanisms underlying derived traits tell us about the evolution of social behavior?* *Annals of the Entomological Society of America*, 2020. **Accpated**.
6. Tribble, W. and D.J.C. Kronauer, *Caste development and evolution in ants: it's all about size*. *Journal of Experimental Biology*, 2017. **220**(1): p. 53-62.
7. Wilson, E.O., *The Evolution of Caste Systems in Social Insects*. *Proceedings of the American Philosophical Society*, 1979. **123**(4): p. 204-210.
8. Lopez-Vaamonde, C., et al., *Effect of the queen on worker reproduction and new queen production in the bumble bee *Bombus terrestris**. *Apidologie*, 2007. **38**(2): p. 171-180.
9. Alaux, C., P. Jaisson, and A. Hefetz, *Reproductive decision-making in semelparous colonies of the bumblebee *bombus terrestris**. *Behavioral Ecology and Sociobiology*, 2005. **59**(2): p. 270-277.
10. Alaux, C., P. Jaisson, and A. Hefetz, *Regulation of worker reproduction in bumblebees (*Bombus terrestris*): workers eavesdrop on a queen signal*. *Behavioral Ecology and Sociobiology*, 2006. **60**(3): p. 439-446.
11. Muller, C. and P. Schmid-Hempel, *Variation in life-history pattern in relation to worker mortality in the bumble-bee, *Bombus lucorum**. *Functional Ecology*, 1992: p. 48-56.
12. Bloch, G., *Regulation of queen-worker conflict in bumble-bee (*Bombus terrestris*) colonies*. *Proc Biol Sci*, 1999. **266**(1437): p. 2465-9.
13. Shykoff, J. and C. Muller, *Reproductive decisions in bumble-bee colonies: the influence of worker mortality in *Bombus terrestris* (Hymenoptera, Apidae)*. *Functional ecology*, 1995: p. 106-112.
14. Deleurance, E.P., *Sur le mécanisme de la monogynie fonctionnelle chez les *Polistes* (*Hyménoptères-Vespides*)*. *Comptes Rendus Hebdomadaires des Seances de L'Academie des Sciences*, 1950. **230**: p. 782-784.
15. Potter, N. *A study of the biology of the common wasp, *Vespula vulgaris* L., with special reference to the foraging behaviour*. 1964.
16. Seeley, T.D., *Honeybee democracy*. 2010, Princeton, New Jersey: Princeton University Press.



17. Schultner, E., J. Oettler, and H. Helantera, *The role of brood in eusocial hymenoptera*. Q Rev Biol, 2017. **92**(1): p. 39-78.
18. Mohammadi, A., et al., *Effect of aliphatic esters on ovary development of queenless bees (Apis mellifera L.)*. Naturwissenschaften, 1998. **85**(9): p. 455-458.
19. Jay, S.C., *Ovary development of worker honeybees when separated from worker brood by various methods*. Canadian Journal of Zoology, 1972. **50**(5): p. 661-664.
20. Maisonnasse, A., et al., *E-beta-ocimene, a volatile brood pheromone involved in social regulation in the honey bee colony (Apis mellifera)*. PLoS One, 2010. **5**(10): p. e13531.
21. Endler, A., et al., *Surface hydrocarbons of queen eggs regulate worker reproduction in a social insect*. Proc Natl Acad Sci U S A, 2004. **101**(9): p. 2945-50.
22. Ebie, J.D., B. Holldobler, and J. Liebig, *Larval regulation of worker reproduction in the polydomous ant Novomessor cockerelli*. Naturwissenschaften, 2015. **102**(11-12): p. 72.
23. Ravary, F., B. Jahyny, and P. Jaisson, *Brood stimulation controls the phasic reproductive cycle of the parthenogenetic ant Cerapachys biroi*. Insectes Sociaux, 2006. **53**(1): p. 20-26.
24. Starkey, J., A. Brown, and E. Amsalem, *The road to sociality: brood regulation of worker reproduction in the simple eusocial bee Bombus impatiens*. Animal Behaviour, 2019. **154**: p. 57-65.
25. Pankiw, T., *Brood pheromone regulates foraging activity of honey bees (Hymenoptera: Apidae)*. J Econ Entomol, 2004. **97**(3): p. 748-51.
26. Pankiw, T., R.E. Page Jr, and M. Kim Fondrk, *Brood pheromone stimulates pollen foraging in honey bees (Apis mellifera)*. Behavioral Ecology and Sociobiology, 1998. **44**(3): p. 193-198.
27. Ulrich, Y., et al., *Ant larvae regulate worker foraging behavior and ovarian activity in a dose-dependent manner*. Behav Ecol Sociobiol, 2016. **70**(7): p. 1011-1018.
28. Free, J.B., *Queen production in colonies of bumblebees*. Proceedings of the Royal Entomological Society of London. Series A, General Entomology, 1955. **30**(1-3): p. 19-25.
29. Cnaani, J., et al., *The effect of queen-worker conflict on caste determination in the bumblebee Bombus terrestris*. Behavioral Ecology and Sociobiology, 2000. **47**(5): p. 346-352.
30. Duchateau, M.J. and H.H.W. Velthuis, *Development and reproductive strategies in Bombus terrestris colonies*. Behavior, 1988. **107**: p. 186-207.
31. Holland, J.G., F.S. Guidat, and A.F. Bourke, *Queen control of a key life-history event in a eusocial insect*. Biol Lett, 2013. **9**(3): p. 20130056.
32. Duchateau, M.J., *Sex ratio variation in the bumblebee Bombus terrestris*. Behavioral Ecology, 2004. **15**(1): p. 71-82.
33. Orlova, M., J. Starkey, and E. Amsalem, *A small family business: synergistic and additive effects of the queen and the brood on worker reproduction in a primitively eusocial bee*. The Journal of Experimental Biology, 2020. **223**(3): p. jeb217547.
34. Orlova, M. and E. Amsalem, *Bumble bee queen pheromones are context-dependent*. Scientific Reports, 2021. **11**(1): p. 16931.

35. Cnaani, J., et al., *Caste determination in Bombus terrestris: Differences in development and rates of JH biosynthesis between queen and worker Larvae*. Journal of Insect Physiology, 1997. **43**(4): p. 373-381.
36. Duchateau, M.J., *Agonistic behaviours in colonies of the bumblebee Bombus terrestris*. Journal of Ethology, 1989. **7**(2): p. 141-151.
37. Amsalem, E. and C.M. Grozinger, *Evaluating the molecular, physiological and behavioral impacts of CO2 narcosis in bumble bees (Bombus impatiens)*. J Insect Physiol, 2017. **101**: p. 57-65.
38. Amsalem, E. and A. Hefetz, *The appeasement effect of sterility signaling in dominance contests among Bombus terrestris workers*. Behavioral Ecology and Sociobiology, 2010. **64**(10): p. 1685-1694.
39. Bates, D., et al., *Fitting Linear Mixed-Effects Models Using lme4*. Journal of Statistical Software, 2015. **67**(1): p. 1 - 48.
40. Ameijeiras-Alonso, J., R.M. Crujeiras, and A. Rodríguez-Casal, *Mode testing, critical bandwidth and excess mass*. TEST, 2019. **28**(3): p. 900-919.
41. Ameijeiras-Alonso, J., R.M. Crujeiras, and A. Rodríguez-Casal, *multimode: An R Package for Mode Assessment*. Journal of Statistical Software, 2021. **97**(9): p. 1 - 32.
42. Cnaani, J., R. Schmid-Hempel, and J.O. Schmidt, *Colony development, larval development and worker reproduction in Bombus impatiens Cresson*. Insectes Sociaux, 2002. **49**(2): p. 164-170.
43. Amsalem, E., et al., *The physiological and genomic bases of bumble bee social behaviour*. Advances in Insect Physiology, 2015. **48**: p. 37-93.
44. Van-Honk, C.J.K., et al., *Factors influencing egg laying of workers in a captive Bombus terrestris colony*. Behavioral Ecology and Sociobiology, 1981. **9**: p. 9-14.
45. Van Doorn, A. and J. Heringa, *The ontogeny of a dominance hierarchy in colonies of the bumblebee Bombus terrestris (Hymenoptera, Apidae)*. Insectes Sociaux, 1986. **33**: p. 3-25.
46. Almond, E.J., et al., *Queen Longevity and Fecundity Affect Conflict with Workers over Resource Inheritance in a Social Insect*. Am Nat, 2019. **193**(2): p. 256-266.
47. Bourke, A.F.G. and F.L.W. Ratnieks, *Kin conflict over caste determination in social Hymenoptera*. Behavioral Ecology and Sociobiology, 1999. **46**(5): p. 287-297.
48. Bourke, A.F. and F.L. Ratnieks, *Kin-selected conflict in the bumble-bee Bombus terrestris (Hymenoptera: Apidae)*. Proc Biol Sci, 2001. **268**(1465): p. 347-55.



# Legend to figures

**Figure 1:** The average colony wet mass throughout the experiment in the three treatment groups: colonies containing no brood (**nb**), colonies containing a double amount of brood (**db**) and control colonies that remain unmanipulated (**c**). Timepoints 0 and 1 refers to the colony wet mass before and after brood manipulation, respectively. Data are presented as means  $\pm$  S.E.M. Asterisks denote statistical difference between all treatments at  $p < 0.05$ .

**Figure 2:** The average number of newly-laid egg batches per day throughout the experiment in the three treatment groups: colonies containing no brood (**nb**), colonies containing a double amount of brood (**db**) and control colonies that remain unmanipulated (**c**). Data are presented as means  $\pm$  SEM. Asterisks denote statistical difference at  $p < 0.05$ .

**Figure 3:** The average sum of aggressive behavior performed towards the queen (A) or by the queen (B) in the three different treatments groups: colonies containing no brood (**nb**), colonies containing a double amount of brood (**db**) and control colonies that remain unmanipulated (**c**). Data are presented as means  $\pm$  S.E.M. Different letters denote significant differences at  $p < 0.05$ .

**Figure 4:** The average oocyte size in workers in the three treatment groups: colonies containing no brood (**nb**), colonies containing a double amount of brood (**db**) and control colonies that remain unmanipulated (**c**). Oocyte size was measured in five timepoints throughout the duration of the experiment using 5-10 workers from each colony. The Number above columns represent the number of workers. Different letters denote significant differences at  $p < 0.05$ .

**Figure 5:** The effect of brood on the total number of eggs, larvae, and pupae on the last day of experiment averaged by treatment: **nb**, colonies containing no brood; **db**, colonies containing a double amount of brood and control colonies that remain unmanipulated, **c**. Different letters denote significant differences at  $p < 0.05$ .

**Figure 6:** The effect of brood on the total number of workers, gynes and males averaged by treatment: **nb**, colonies containing no brood; **db**, colonies containing a double amount of brood and control colonies that remain unmanipulated, **c**. Different letters denote significant differences at  $p < 0.05$ .

488 **Figure 7:** The effect of brood on the distribution of larval weight by the end of the experiment  
 489 grouped by treatment: **nb**, colonies containing no brood; **db**, colonies containing a double amount  
 490 of brood and control colonies that remain unmanipulated, **c**.

491

492



Fig 2

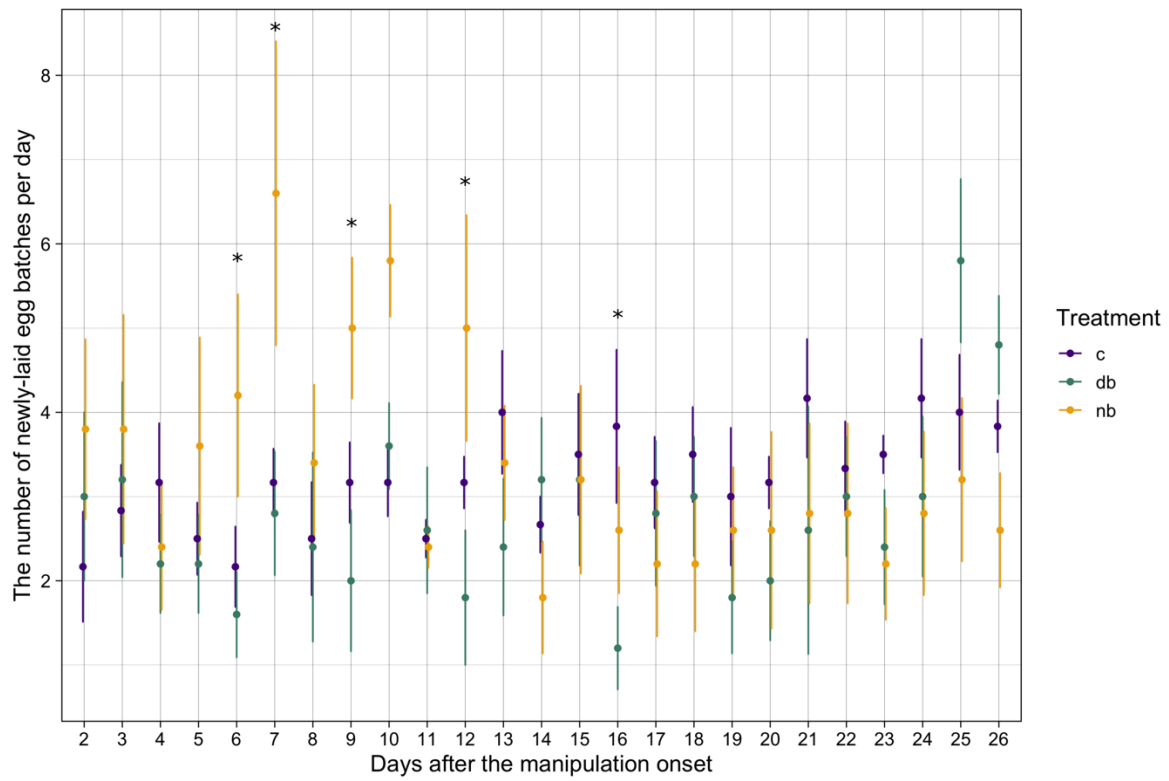

Fig 3

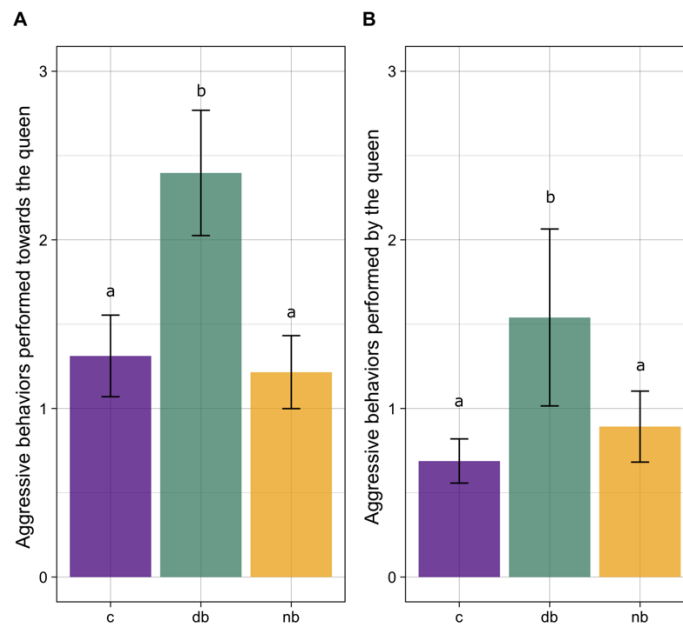

502

Fig 4

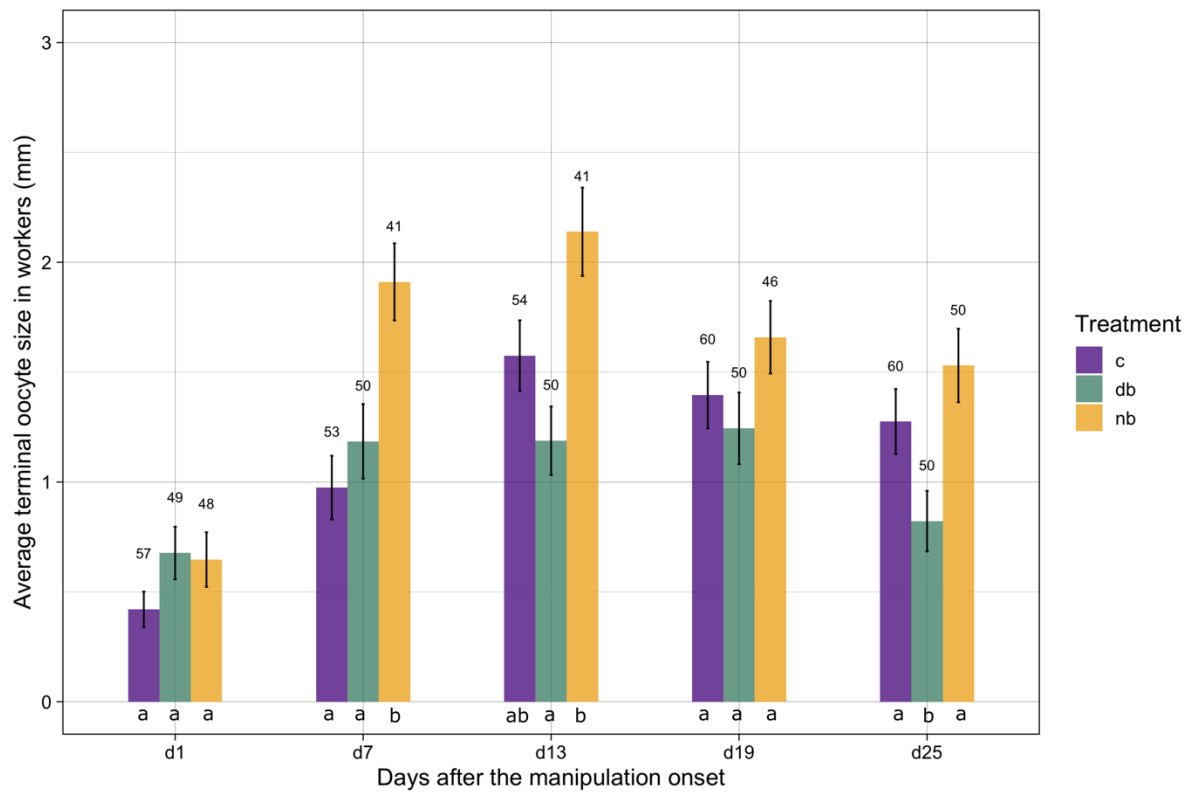

503

504

Fig 5

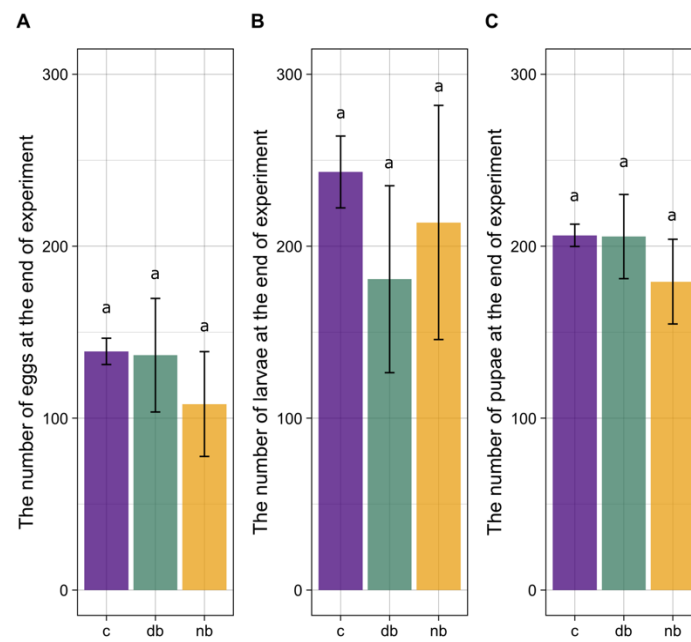

Fig 6

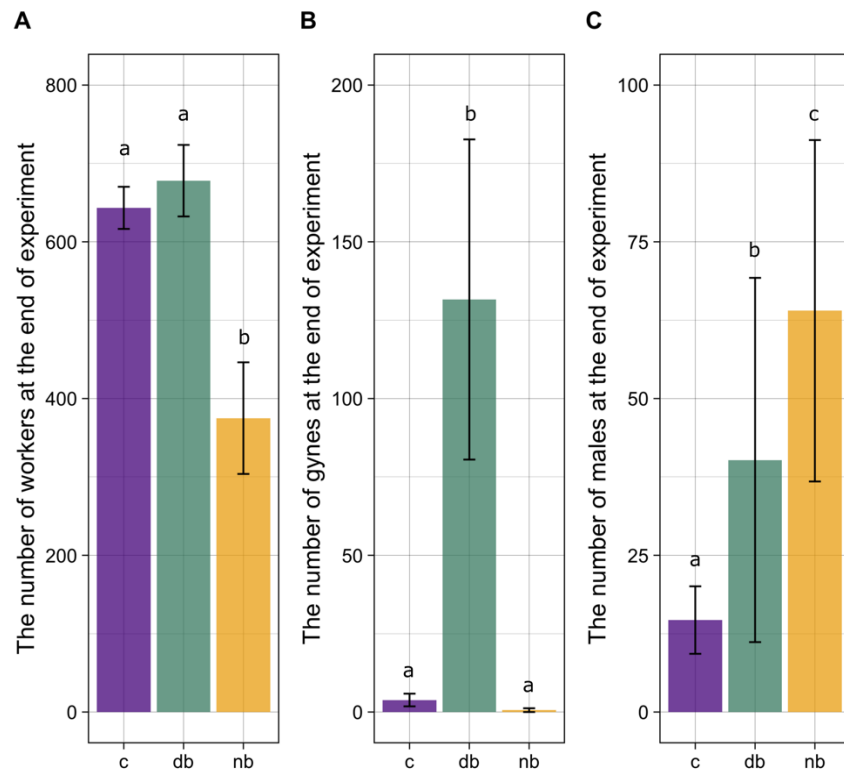



Fig 7

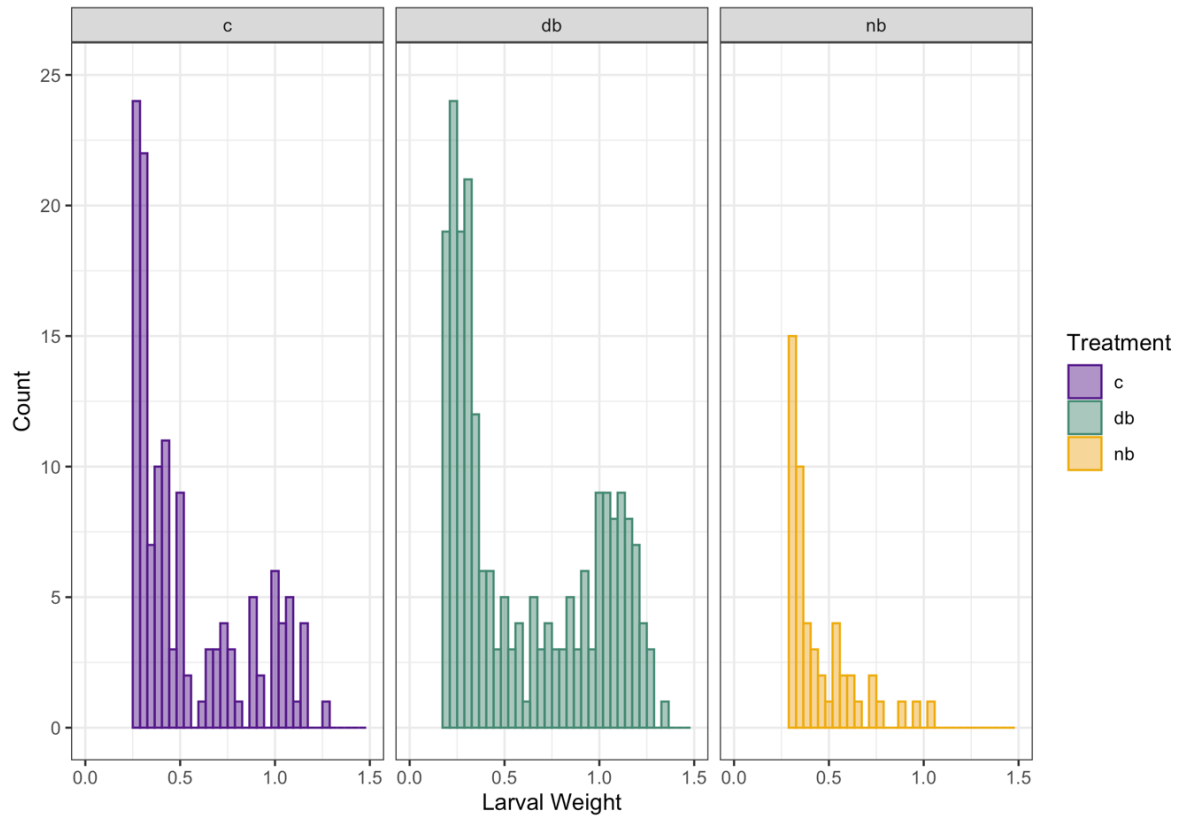

Source: http://biorxiv.org/content/10.1101/2022.07.04.498320v1.full.pdf
